# Supplementary material
Source: PubMed Central journal article supplement (PMC6052861)
Supplement: NIHMS945754-supplement-1.pdf [file NIHMS945754-supplement-1.pdf]

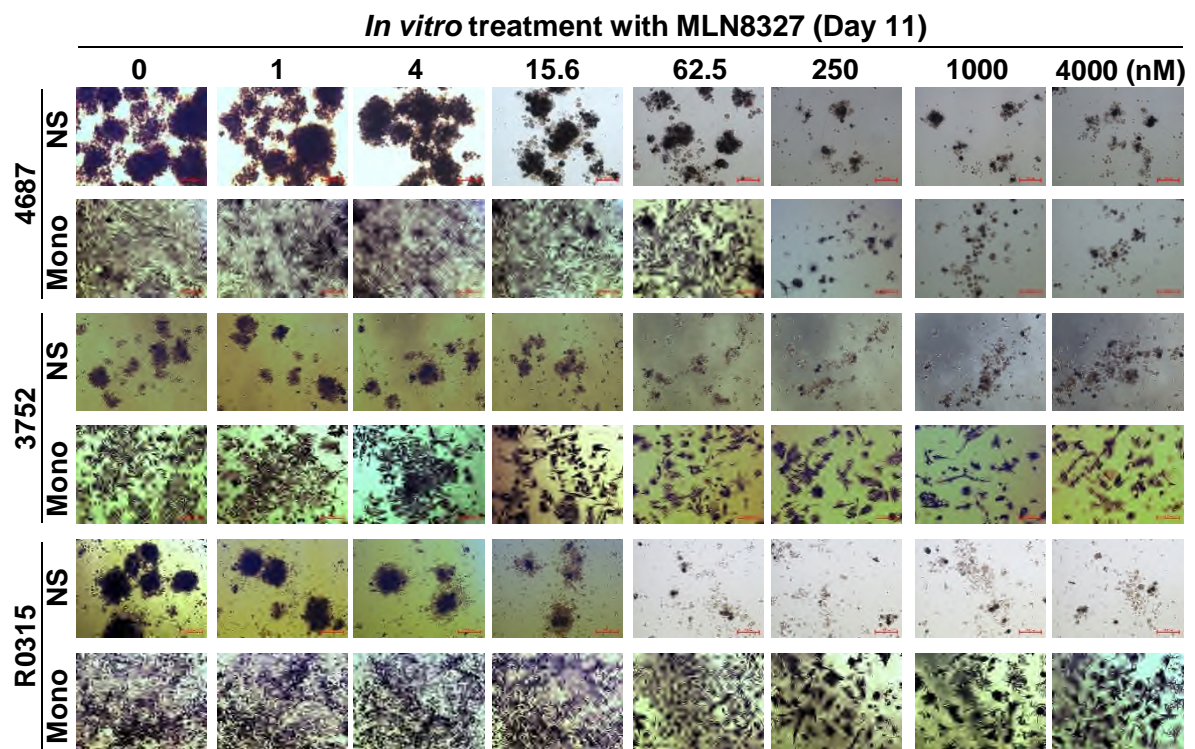

**Figure S1. Anti-proliferative effects of MLN8237 on pGBM cell lines.** Paired monolayer (*Mono*) and neurosphere (*NS*) of IC-4687GBM, IC-3752GBM and IC-R0315GBM were seeded at 2,000 cells/well and exposed to MLN8237 (1 - 4,000 nM) and anti-proliferative effect was assessed by staining with 250 µg/mL of MTT for 4 hrs at day 11. Viable cells were stained with dark colored intracellular crystal. (Bar=100 µm)

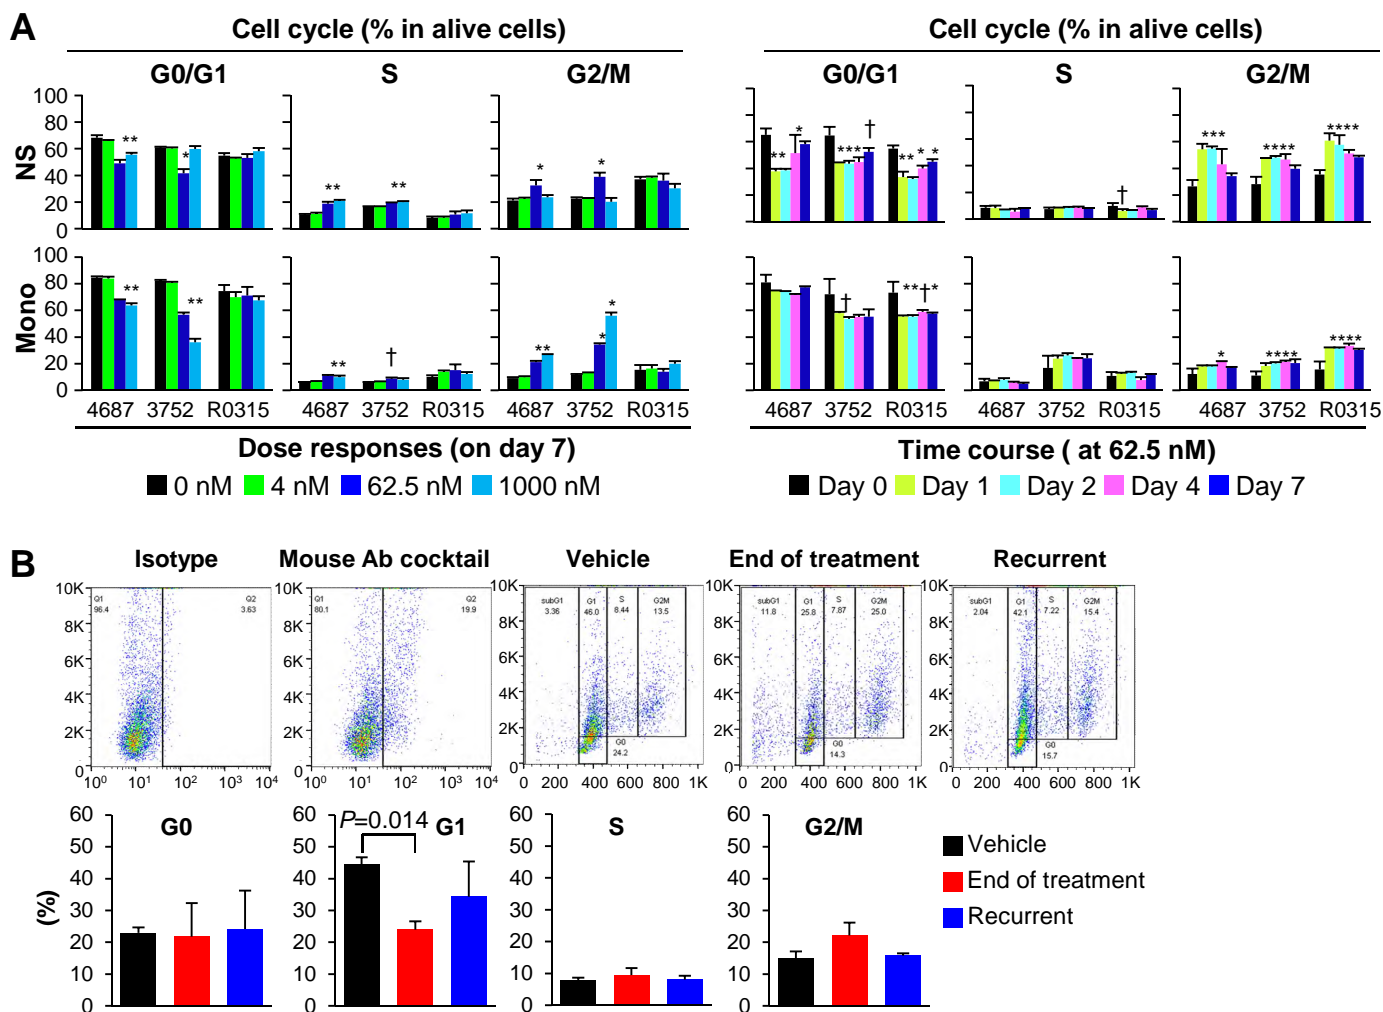

**Figure S2. FCM analysis of cell cycle distribution *in vitro* and *in vivo*.**

A. *In vitro* analysis was performed in paired monolayer (**Mono**) and neurosphere (**NS**) cells of IC-4687GBM, IC-3752GBM and IC-R0315GBM. Both dose-responses (on day 7) (*left panel*) and time-course change (at 62.5 nM) (*right panel*) were examined and presented as percentages of G<sub>0</sub>/G<sub>1</sub>, S and G<sub>2</sub>/M phase in alive cells. † $P < 0.05$ , \* $P < 0.01$  compared to the untreated (0 nM) cells.

B. *In vivo* changes of cell cycle distribution were analyzed in IC-4687GBM cells treated by MLN8237 (30 mg/kg/day for 12 days by gavage). In addition to the recurrent tumors (**Recurrent**) harvested when the mice became moribund in the survival group, a separate group of tumors harvested 1 hr post the last treatment of MLN8237 (30 mg/kg/day for 12 days by gavage) (**End of Treatment** samples) were also included. DNA/RNA were stained with Hoechst 33342/Pyronin Y followed by mouse antibody cocktail staining (to gate out mouse cells) and analyzed by FCM. Representative DNA/RNA profiles (*upper panel*) and percentage of G<sub>0</sub>, G<sub>1</sub>, S and G<sub>2</sub>/M phase in cell cycle (*lower panel*) were presented.

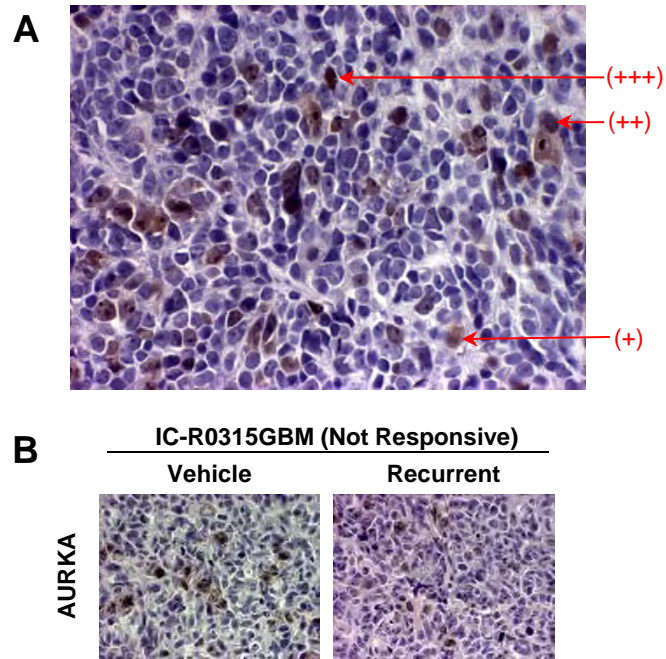

**Figure S3. Representative images of IHC of AURKA.** **A.** Representative images of AURKA in IC-4687GBM xenograft showing the cells with different staining intensity (*arrow*) (Magnification: x40). **B.** AURKA protein expression in IC-R0315GBM in the vehicle treated control and in the recurrent tumor (magnification: x40).
